# Supplementary material for: Hepatic neuregulin 4 signaling defines an endocrine checkpoint for steatosis-to-NASH progression
Source: JCI journal article supplement (doi:10.1172/jci96324), 2017-11-05
Supplement: sd1 [file 1]

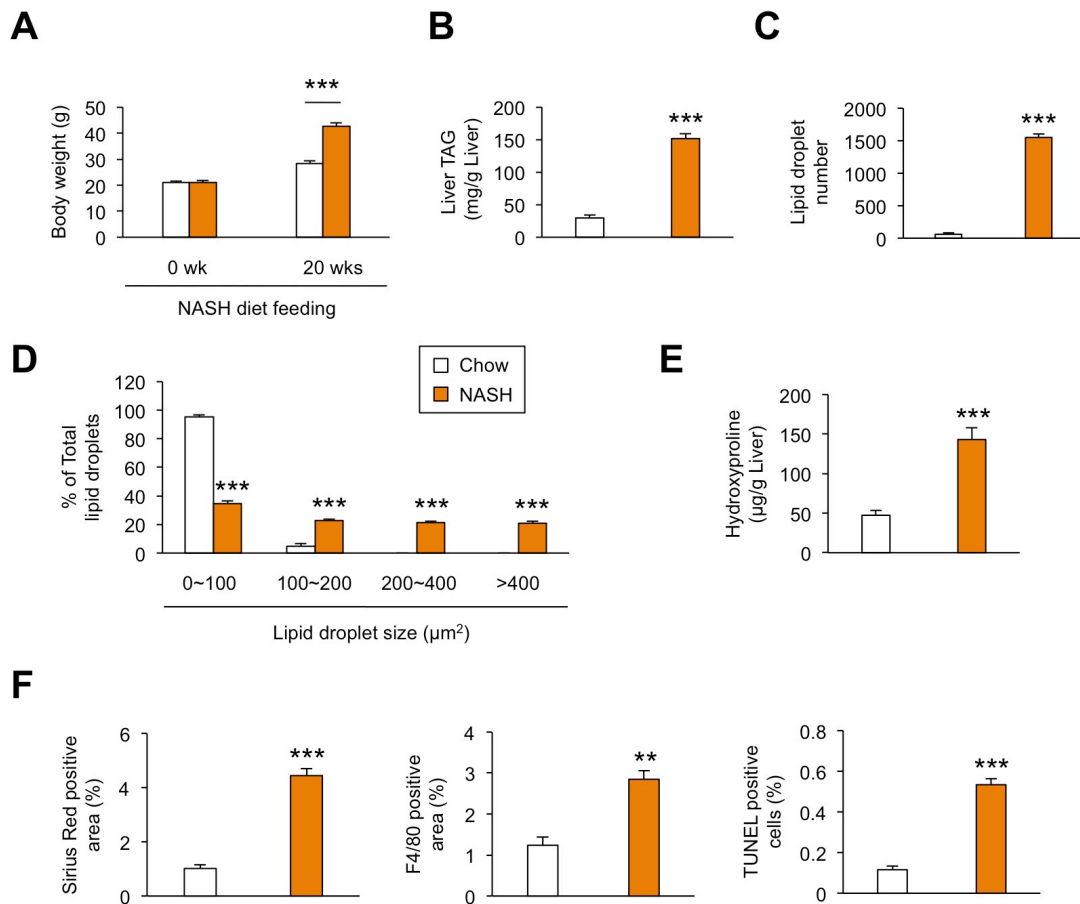

### Supplemental Figure 1. Diet-induced NASH pathologies in mice.

The following parameters were measured in male C57BL/6J WT male mice fed chow (open, n=4) or NASH diet (orange, n=4) for 20 weeks, starting at 3 months of age. Data represent mean  $\pm$  SEM. \*\*p < 0.01, \*\*\*p < 0.001; two-tailed unpaired Student's t test.

- (A) Body weight before and after 20 weeks of chow or NASH diet feeding.
- (B) Liver TAG content.
- (C) Quantification of lipid droplet numbers based on the liver H&E staining images.
- (D) Lipid droplet size analysis based on the liver H&E staining images.
- (E) Liver hydroxyproline content.
- (F) Quantification of Sirius Red, F4/80, and TUNEL staining images in Figure 1C.

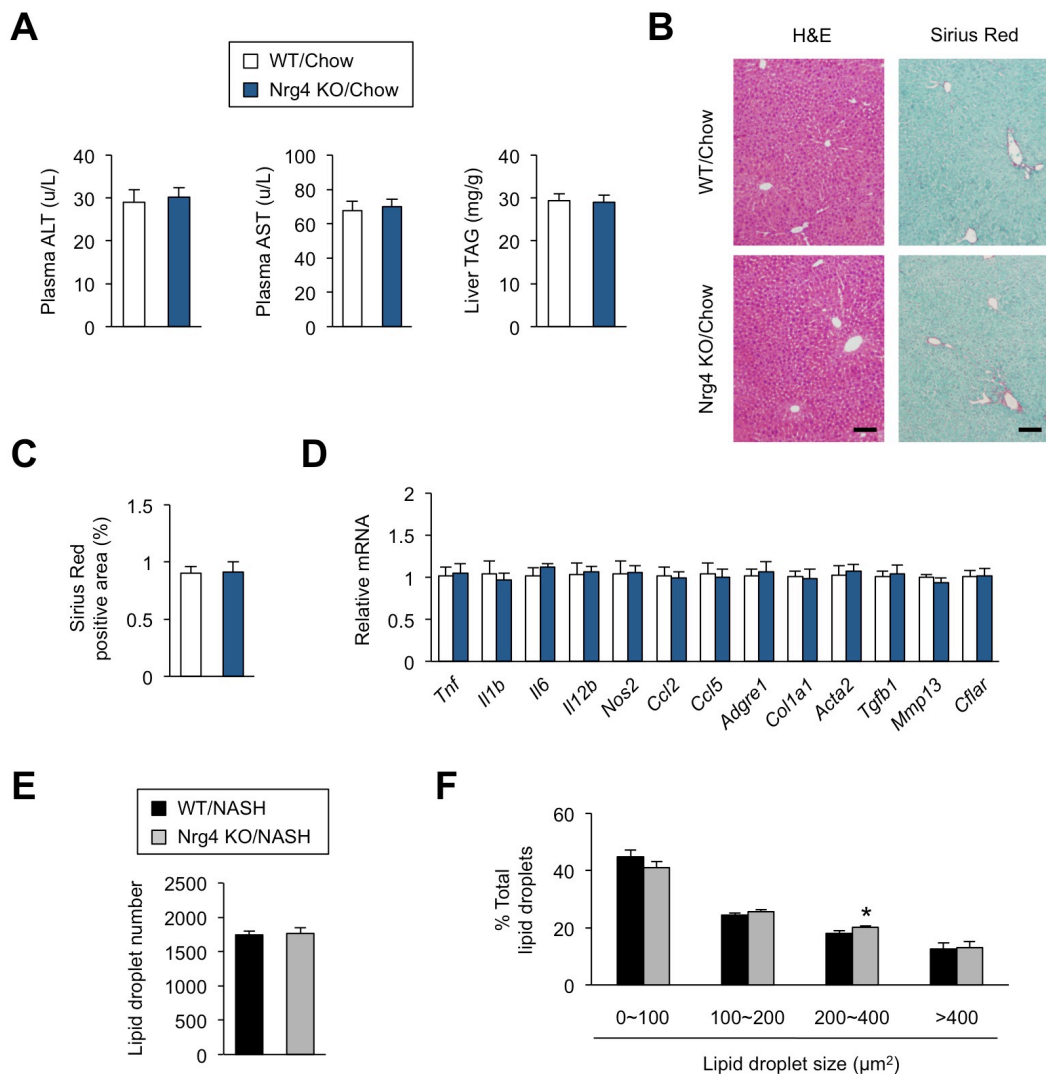

**Supplemental Figure 2. Hepatic and plasma parameters in WT and Nrg4 KO mice fed chow or NASH diet.**

The parameters from (A) to (D) were measured in WT (open, n=5) and Nrg4 KO (blue, n=6) male mice fed standard chow. Mice were sacrificed for analysis at 8 months of age. Data represent mean  $\pm$  SEM. Two-tailed unpaired Student's t test.

(A) Plasma ALT and AST levels and liver TAG content.

(B) H&E and Sirius Red staining of liver sections (bar. 100  $\mu\text{m}$ ).

(C) Quantification of the Sirius Red staining images.

(D) qPCR analysis of hepatic gene expression.

The parameters from (E) to (F) were measured in mice fed NASH diet as described in Figure 2. Data represent mean  $\pm$  SEM. \*p < 0.05; two-tailed unpaired Student's t test.

(E) Quantification of lipid droplet number based on the liver H&E staining images.

(F) Lipid droplet size analysis based on the liver H&E staining images.

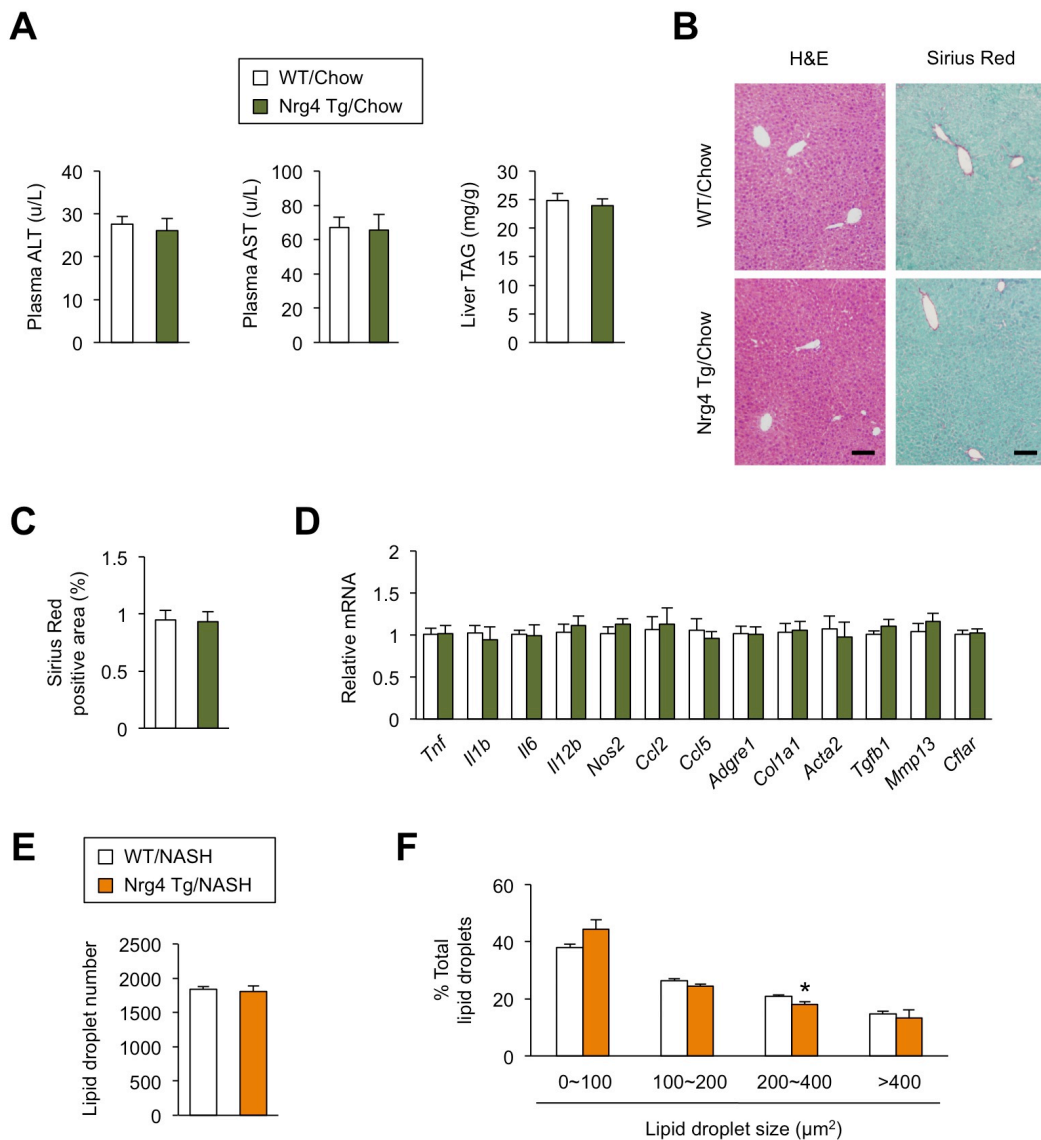

**Supplemental Figure 3. Hepatic and plasma parameters in WT and Nrg4 Tg mice fed chow or NASH diet.**

The parameters from (A) to (D) were measured in WT (open, n=7) and Nrg4 Tg (green, n=5) male mice fed standard chow. Mice were sacrificed for analysis at 8 months of age. Data represent mean  $\pm$  SEM. Two-tailed unpaired Student's t test.

(A) Plasma ALT, AST levels and liver TAG content.

(B) H&E and Sirius Red staining of liver sections (bar. 100  $\mu\text{m}$ ).

(C) Quantification of the Sirius Red staining images.

(D) qPCR analysis of hepatic gene expression.

The parameters from (E) to (F) were measured in mice fed NASH diet as described in Figure 3. Data represent mean  $\pm$  SEM. \*p < 0.05; two-tailed unpaired Student's t test.

(E) Quantification of lipid droplet number based on the liver H&E staining images.

(F) Lipid droplet size analysis based on the liver H&E staining images.

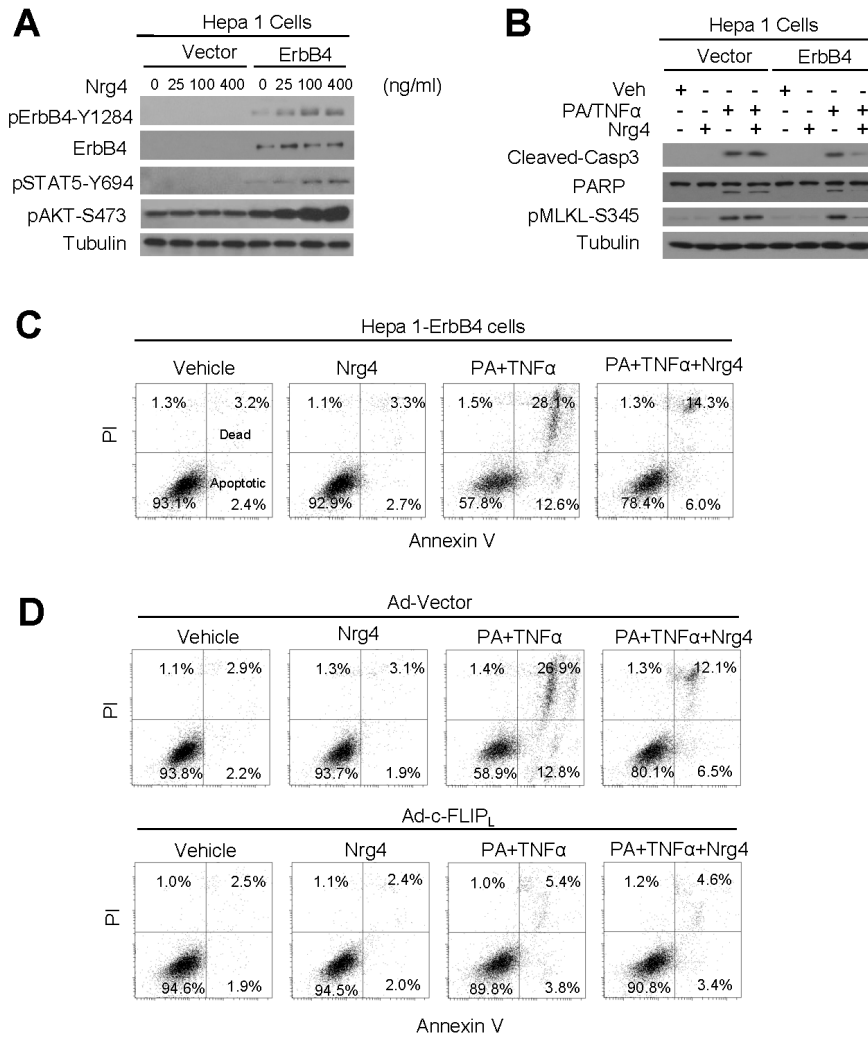

**Supplemental Figure 4. Nrg4 suppresses hepatocyte cell death through c-FLIP<sub>L</sub> in Hepa 1 cells.**

(A) Immunoblots of Hepa 1 cells stably expressing vector or ErbB4 and treated for 20 min with different concentrations of recombinant Nrg4.

(B) Immunoblots of total lysates from Hepa 1 cells stably expressing vector or ErbB4 and treated with 100  $\mu$ M palmitic acid (PA) for 2 hrs followed by addition of 20 ng/ml TNF $\alpha$  and 100 ng/ml Nrg4 for 20 hrs.

(C) Representative flow cytometry plots for Figure 4G.

(D) Representative flow cytometry plots for Figure 5F.

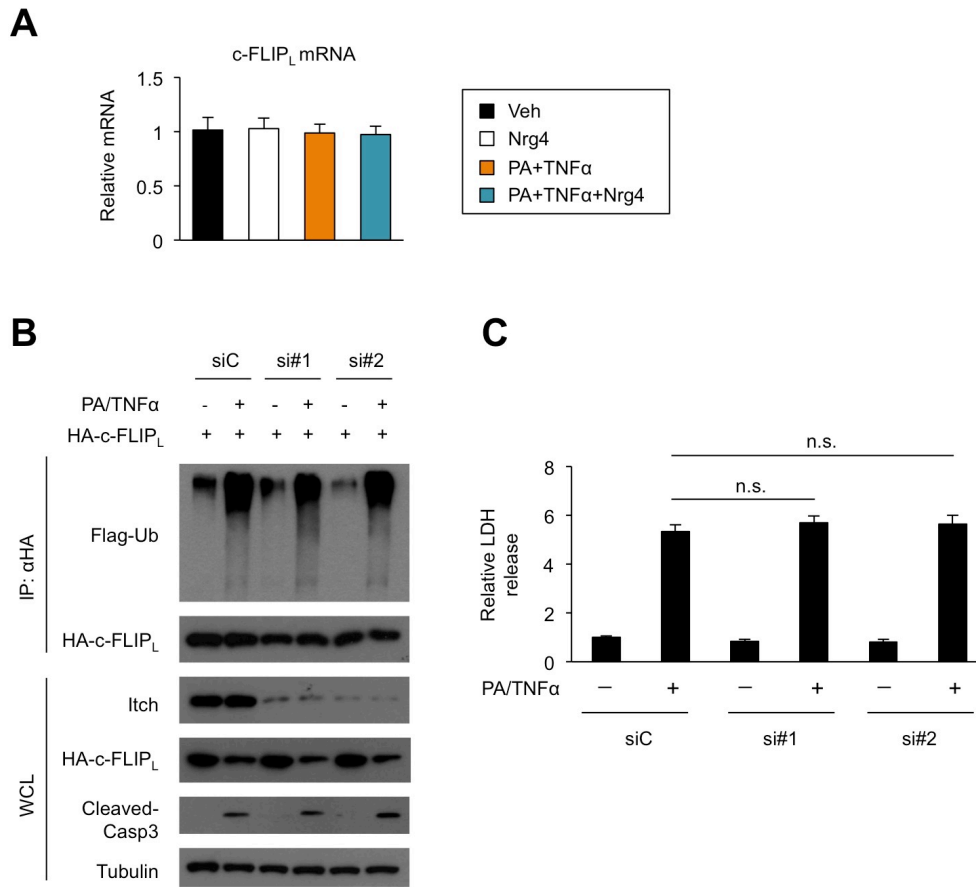

**Supplemental Figure 5. c-FLIP<sub>L</sub> mRNA expression and siRNA knockdown of Itch.**

(A) qPCR analysis of c-FLIP<sub>L</sub> mRNA expression. Hepa 1 cells stably expressing ErbB4 were treated with PA+TNF $\alpha$  in the absence or presence of 100 ng/ml Nrg4 for 6 hrs. Data represent mean  $\pm$  SEM. one-way ANOVA.

The following experiments were performed in Hepa 1 cells. Cells were cultured in serum-free medium during treatment. WCL: whole cell lysates.

(B) Immunoblots of IP and WCL from Hepa 1 cells transfected with control siRNA (siC) or Itch siRNAs (si#1 and si#2) along with plasmids encoding HA-tagged c-FLIP<sub>L</sub> and Flag-tagged ubiquitin (Flag-Ub). Transfected cells were treated with or without PA/TNF $\alpha$  for 4 hrs.

(C) LDH release by Hepa 1 cells treated with or without PA/TNF $\alpha$  for 20 hrs. Data represent mean  $\pm$  SEM. n.s.= no significant difference; one-way ANOVA.

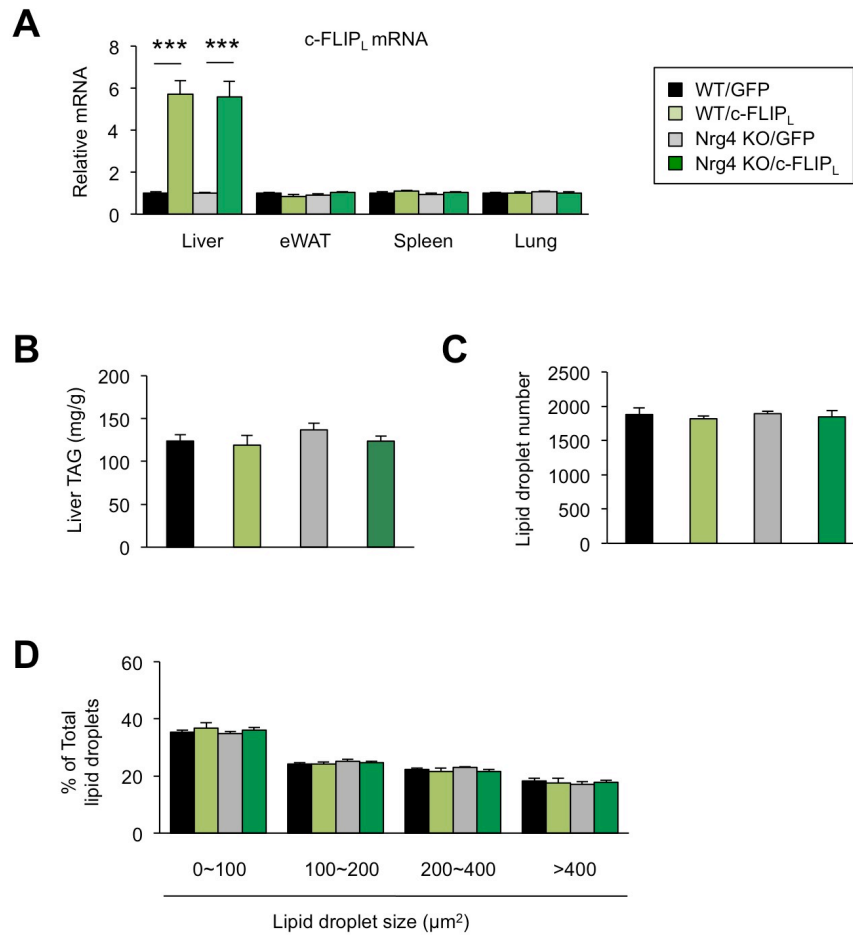

**Supplemental Figure 6. qPCR analysis of c-FLIP<sub>L</sub> mRNA expression and liver lipid droplet analysis.**

The following experiments correspond to AAV-transduced mice described in Figure 7 and 8. Data represent mean  $\pm$  SEM. \*\*\* $p < 0.001$ , n.s.= no significant difference; one-way ANOVA.

(A) qPCR analysis of c-FLIP<sub>L</sub> mRNA expression.

(B) Liver TAG content.

(C) Quantification of lipid droplet number based on the liver H&E staining images.

(D) Lipid droplet size analysis based on the liver H&E staining images.

**Supplemental Table 1. List of qPCR primers.**

| <b>Human genes</b> |                           |                          |
|--------------------|---------------------------|--------------------------|
| <b>Gene name</b>   | <b>Forward primer</b>     | <b>Reverse primer</b>    |
| <i>Il1b</i>        | TTCGACACATGGGATAACGAGG    | TTTTTGCTGTGAGTCCCGGAG    |
| <i>Tnf</i>         | GAGGCCAAGCCCTGGTATG       | CGGGCCGATTGATCTCAGC      |
| <i>Nos2</i>        | AGGGACAAGCCTACCCCTC       | CTCATCTCCCGTCAGTTGGT     |
| <i>Col1a1</i>      | GTGCGATGACGTGATCTGTGA     | CGGTGGTTTCTTGGTCCGGT     |
| <i>Acta2</i>       | TGCCAACAACGTCATGTCTG      | CAGCGCGGTGATCTCTTTCT     |
| <i>Tgfb1</i>       | CAATTCCTGGCGATACCTCAG     | GCACAACCTCCGGTGACATCAA   |
| <i>36B4</i>        | AGGCGTCCTCGTGAAGTGA       | GCGGATCTGCTGCATCTGCT     |
| <b>Mouse genes</b> |                           |                          |
| <b>Gene name</b>   | <b>Forward primer</b>     | <b>Reverse primer</b>    |
| <i>Tnf</i>         | AGCCCCCAGTCTGTATCCTT      | CTCCCTTTGCAGAACTCAGG     |
| <i>Il1b</i>        | TGGCAACTGTTCTGAACTCAA     | AGCAGCCCTTCATCTTTTGG     |
| <i>Il6</i>         | AGTTGCCTTCTTGGGACTGA      | TCCACGATTGCCAGAGAAC      |
| <i>Il12b</i>       | CCAGAGACATGGAGTCATAG      | AGATGTGAGTGGCTCAGAGT     |
| <i>Nos2</i>        | GAGGCCCAGGAGGAGAGATCCG    | TCCATGCAGACAACCTTGGTGTG  |
| <i>Ccl2</i>        | AGGTCCCTGTCATGCTTCTG      | TCTGGACCCATTCTTCTTG      |
| <i>Ccl5</i>        | TGCCACGTCAAGGAGTATTT      | TTCTCTGGGTTGGCACACACT    |
| <i>Adgre1</i>      | ATCCTTGCCATCCGGCAGA       | GCAAAGCCAGGGTGGCAAGT     |
| <i>Col1a1</i>      | AAGAGGCGAGAGAGGTTTCC      | AGAACCATCAGCACCTTTGG     |
| <i>Acta2</i>       | CTGACAGAGGCACCACTGAA      | CATCTCCAGAGTCCAGCACA     |
| <i>Tgfb1</i>       | ACCATGCCAACTTCTGTCTGGGAC  | ACAACCTGCTCCACCTTGGGCTTG |
| <i>Mmp13</i>       | TGCTTCCTGATGATGACGTTCAAGG | TGGGATGCTTAGGGTTGGGGTC   |
| <i>CFLAR</i>       | GCTCCAGAATGGGCGAAGTAA     | ACGGATGTGCGGAGGTAAAAA    |
| <i>Nrg4</i>        | CCCAGCCCATTCTGTAGGTG      | ACCACGAAAGCTGCCGATAG     |
| <i>36B4</i>        | GAAACTGCTGCCTCACATCCG     | GCTGGCACAGTGACCTCACACG   |
